1 **Delta spike P681R mutation enhances SARS-CoV-2 fitness over Alpha variant**

2 Yang Liu<sup>1,2,\*</sup>, Jianying Liu<sup>2,3,4,\*</sup>, Bryan A. Johnson<sup>4</sup>, Hongjie Xia<sup>1</sup>, Zhiqiang Ku<sup>5</sup>, Craig  
3 Schindewolf<sup>2,3,4</sup>, Steven G. Widen<sup>1</sup>, Zhiqiang An<sup>5</sup>, Scott C. Weaver<sup>2,3,4</sup>, Vineet D. Menachery<sup>2,3,4</sup>,  
4 Xuping Xie<sup>1#</sup>, and Pei-Yong Shi<sup>1,2,3,#</sup>

5  
6 <sup>1</sup>Department of Biochemistry and Molecular Biology, University of Texas Medical Branch,  
7 Galveston TX, USA

8 <sup>2</sup>Institute for Human Infections and Immunity, University of Texas Medical Branch, Galveston  
9 TX, USA

10 <sup>3</sup>World Reference Center for Emerging Viruses and Arboviruses, University of Texas Medical  
11 Branch, Galveston TX, USA

12 <sup>4</sup>Department of Microbiology and Immunology, University of Texas Medical Branch, Galveston  
13 TX, USA

14 <sup>5</sup>Texas Therapeutics Institute, Brown Foundation Institute of Molecular Medicine, The University  
15 of Texas Health Science Center at Houston, Houston, TX 77030, USA

16

17 \*YL and JL made equal contributions to the study

18

19 #Correspondence: X.X. (xuxie@UTMB.edu) or P.-Y.S. (peshi@UTMB.edu)

20

21 **Abstract**

22 SARS-CoV-2 Delta variant has rapidly replaced the Alpha variant around the world. The  
23 mechanism that drives this global replacement has not been defined. Here we report that Delta  
24 spike mutation P681R plays a key role in the Alpha-to-Delta variant replacement. In a replication  
25 competition assay, Delta SARS-CoV-2 efficiently outcompeted the Alpha variant in human lung  
26 epithelial cells and primary human airway tissues. Delta SARS-CoV-2 bearing the Alpha-spike  
27 glycoprotein replicated less efficiently than the wild-type Delta variant, suggesting the  
28 importance of Delta spike in enhancing viral replication. The Delta spike has accumulated  
29 mutation P681R located at a furin cleavage site that separates the spike 1 (S1) and S2  
30 subunits. Reverting the P681R mutation to wild-type P681 significantly reduced the replication

31 of Delta variant, to a level lower than the Alpha variant. Mechanistically, the Delta P681R  
32 mutation enhanced the cleavage of the full-length spike to S1 and S2, leading to increased  
33 infection via cell surface entry. In contrast, the Alpha spike also has a mutation at the same  
34 amino acid (P681H), but the spike cleavage from purified Alpha virions was reduced compared  
35 to the Delta spike. Collectively, our results indicate P681R as a key mutation in enhancing Delta  
36 variant replication via increased S1/S2 cleavage. Spike mutations that potentially affect furin  
37 cleavage efficiency must be closely monitored for future variant surveillance.

38

## 39 **Introduction**

40 The continuous emergence of new variants of severe acute respiratory syndrome  
41 coronavirus 2 (SARS-CoV-2) poses the greatest threat to pandemic control, vaccine  
42 effectiveness, therapeutic efficacy, and surveillance. Since its emergence in late 2019,  
43 mutations have unceasingly emerged in the circulating viruses, leading to variants with  
44 enhanced transmissibility, evasion of therapeutic antibodies, and breakthrough infections in  
45 vaccinated individuals.<sup>1-6</sup> Since the viral spike glycoprotein is responsible for binding to the  
46 human cellular receptor angiotensin-converting enzyme (ACE2), many mutations have  
47 accumulated in the spike gene with the potential to alter viral fitness or to escape immunity. The  
48 variants have emerged from different geographic regions and, depending on their biological  
49 properties, spread to other regions. The World Health Organization (WHO) has classified  
50 variants as “variants of concern” (*i.e.*, Alpha, Beta, Gamma, and Delta) and “variants of interest”  
51 (*i.e.*, Eta, Iota, Kappa, and Lambda).<sup>7</sup> The Alpha variant was first identified in the United  
52 Kingdom in September 2020 and subsequently became dominant in many parts of the world.  
53 Afterwards, the Delta variant emerged in India in October 2020 and has now spread to over 119  
54 countries, displacing the Alpha variant globally.<sup>7,8</sup> From May 2 to July 31 of 2021, the  
55 prevalence of the Delta variant in the USA had increased from 1.3% to 94.4%, whereas the

56 prevalence of the Alpha variant had decreased from 70% to 2.4%. More seriously, the Delta  
57 variant has been associated with increased transmissibility, disease severity, and breakthrough  
58 infections in vaccinated individuals.<sup>5,9-11</sup> The mutation(s) that have driven the explosive spread  
59 of the Delta variant and its displacement of the Alpha variant remain to be defined. In this study,  
60 we used a reverse genetic approach to identify the molecular determinant(s) for the enhanced  
61 fitness of Delta variant and its dominance over the Alpha variant.

62

## 63 **Results**

64 We constructed infectious cDNA clones for the Alpha (GISAIS ID: EPI\_ISL\_999340) and  
65 Delta (GISAIS ID: EPI\_ISL\_2100646) SARS-CoV-2 variants using a previously established  
66 protocol (**Extended data Fig. 1**).<sup>12,13</sup> The infectious cDNA clones enabled us to prepare  
67 recombinant Alpha and Delta SARS-CoV-2 variants (**Fig. 1a**). Both Alpha and Delta variants  
68 rescued from these clones developed smaller plaques on Vero E6 cells than the earlier  
69 USA/WA1-2020 (wild-type) strain isolated in January 2020 (**Extended data Fig. 2**). Sequencing  
70 analysis showed no undesired mutations in the rescued recombinant virus stocks. To compare  
71 the viral replication fitness between the Alpha and Delta variants, we performed a competition  
72 assay by infecting cells with a mixture of the two viruses at a plaque-forming unit (PFU) ratio of  
73 1:1, followed by quantifying the ratios of the two viral RNA species at different days post  
74 infection. Compared with analyzing individual viruses separately, the competition assay has the  
75 advantages of (i) a built-in internal control of each viral replication and (ii) elimination of host-to-  
76 host variation that reduces experimental power. Due to its precision and reproducibility<sup>14</sup>, the  
77 competition assay has been widely used to study microbial fitness,<sup>15-17</sup> including SARS-CoV-  
78 2<sup>1,18</sup>. When infecting human lung adenocarcinoma Calu-3 cells, the RNA ratio of Delta versus  
79 Alpha increased to 3.0, 7.0, and 4.1 at 24, 36, and 48 h post infection, respectively (**Extended**  
80 **data Fig. 3**). When infecting primary human airway epithelial (HAE) cultures, the RNA ratio of

81 Delta versus Alpha increased from 1.7 on day 1 to 3.1 on day 5 (**Fig. 1b**). These results indicate  
82 that Delta variant has greater replication fitness compared to the Alpha variant in *in vitro*  
83 respiratory models of SARS-CoV-2 infection.

84 To examine if the spike gene alone determines the improved replication fitness of the  
85 Delta variant, we constructed a chimeric Delta SARS-CoV-2 bearing the Alpha-spike  
86 glycoprotein (*i.e.*, Alpha-spike/Delta-backbone virus; **Fig. 1a** and **Extended data Fig. 2b**). In a  
87 competition assay on HAE culture, the RNA ratio of Delta versus Alpha-spike/Delta-backbone  
88 continuously increased from 2.8 on day 1 to 9.8 on day 5 post infection (**Fig. 1c**), suggesting  
89 that (i) the Alpha-spike reduces the replication fitness of the Delta variant and (ii) the spike gene  
90 drives the improved replication of Delta variant. Interestingly, the Alpha-spike/Delta-backbone  
91 virus replicated less efficiently than the Alpha variant on HAE culture (**Fig. 1d**), suggesting that,  
92 in contrast to Delta spike mutations that enhance replication, mutations outside the spike gene  
93 of the Delta variant reduced to some degree fitness for viral replication. The above  
94 quantifications of viral competition outcomes were measured by Sanger sequencing (**Fig. 1b-d**)  
95 and subsequently verified by Illumina next generation sequencing (NGS; **Extended data Fig.**  
96 **4**).

97 Delta spike has accumulated mutations T19R, G142D, E156G, F157-R158 deletion,  
98 L452R, T478K, D614G, P681R, and D950N,<sup>19</sup> among which P681R is located at a furin  
99 cleavage site (PRRAR↓S with P681 underlined and “↓” indicating furin cleavage) that is absent  
100 in other group 2B coronaviruses.<sup>20</sup> Since the furin cleavage site was shown to be important for  
101 SARS-CoV-2 replication and pathogenesis,<sup>21,22</sup> we hypothesized that mutation P681R may  
102 improve the furin cleavage efficiency of full-length spike to S1 and S2, leading to a more  
103 efficient virus entry into respiratory epithelial cells. To test this hypothesis, we reverted the Delta  
104 P681R mutation to wild-type P681 in the Delta SARS-CoV-2 (**Extended data Fig. 2a**). The  
105 Delta-P681 virus developed equivalent plaque morphology compared with Delta (**Extended**

106 **data Fig. 2b**). Remarkably, the P681 reversion attenuated Delta variant replication on HAE  
107 cultures, as evidenced by the increase in the RNA ratio of wild-type Delta versus Delta-P681  
108 from 2.2 on day 1 to 3.4 on day 5 (**Fig. 1e**). The replication of the Delta-P681 virus was even  
109 lower than that of the Alpha variant, as suggested by the decrease in the RNA ratio of Delta-  
110 P681 versus Alpha variant from 0.9 on day 1 to 0.6 on day 5 (**Fig. 1f**). These results  
111 demonstrate that mutation P681R at the furin cleavage site plays a critical role in enhancing the  
112 replication of the Delta variant on primary human airway cultures.

113 We directly evaluated the spike cleavage of Alpha, Delta, Delta-P681, and wild-type  
114 SARS-CoV-2. Virions were prepared from Vero E6 cells expressing TMPRSS2, a host serine  
115 protease that is required for SARS-CoV-2 entry via the ACE2-mediated cell surface  
116 mechanism.<sup>23</sup> After virions were purified through sucrose cushion ultracentrifugation, pelleted  
117 viruses were analyzed for spike cleavage by Western blotting (**Fig. 1g**). The results showed that  
118 spike processing efficiency of the purified virions occurred in the order of Delta > Alpha > Delta-  
119 P681 > wild-type virions, with ratios of S1 versus full-length spike of 15.3, 5.4, 2.7, and 1.4,  
120 respectively (**Fig. 1h**). It should be noted that the Alpha variant also has a spike mutation at  
121 amino acid position 681 (P681H), which may contribute to the increase in spike cleavage when  
122 compared with the wild-type USA/WA1-2020 virus; however, a recent study showed that  
123 mutation P681H alone did not enhance viral fitness or transmission.<sup>4</sup> Overall, our results  
124 indicate a correlation of improved spike cleavage with enhanced viral replication of Delta  
125 variant.

126 To exclude the possibility that enhanced replication of the Delta variant over Alpha was  
127 due to an improved spike/ACE2 receptor interaction, we performed a binding assay using  
128 recombinant spike receptor-binding domain (RBD) and human ACE2 proteins on a Bio-Layer  
129 Interferometry (BLI) system (**Extended data Fig. 5**). Within the RBD, the Alpha RBD has a  
130 N501Y mutation, whereas Delta RBD has L452R and T478K mutations. The BLI results indicate

131 that the Alpha RBD has a higher binding affinity for ACE2 than Delta RBD, as indicated by  
132 >200-fold  $K_D$  improvement (**Extended data Fig. 5**). These data strongly argue that the higher  
133 replication of Delta variant than Alpha variant is not due to an improved spike/ACE2 receptor  
134 binding.

135

## 136 **Discussion**

137 Since the emergence of SARS-CoV-2, the virus has accumulated mutations improving  
138 fitness and transmission. First, it accumulated a D614G mutation in the spike gene to enhance  
139 viral transmission.<sup>1,3,6,24</sup> This mutation promotes spike RBD in an “open” conformation to  
140 facilitate ACE2 receptor binding.<sup>25</sup> Subsequently, another spike mutation N501Y emerged  
141 independently in Alpha, Beta, and Gamma variants from the United Kingdom, South Africa, and  
142 Brazil, respectively. The N501Y mutation further increases the binding affinity between the spike  
143 protein and ACE2, leading to additional improvement in viral transmission.<sup>4,10,26</sup> Most recently,  
144 the Delta variant emerged and spread explosively, replacing the Alpha variant around the world.  
145 The current study demonstrates that spike mutation(s) are responsible for the enhanced viral  
146 fitness of the Delta variant over Alpha. Importantly, the unique P681R mutation plays a critical  
147 role in this fitness advantage and increases the processing of Delta spike to S1 and S2, most  
148 likely through an improved furin cleavage when newly assembled virions egress through the  
149 trans-Golgi network. Although the original SARS-CoV-2 strain has a functional furin cleavage  
150 site with a minimal recognition site of RXXR↓,<sup>27</sup> adjacent residues influence the cleavage  
151 efficiency.<sup>28</sup> The P681R substitution clearly augments spike processing and is likely the main  
152 driver of the fitness advantage observed in Delta variant. When the Delta variant infects  
153 respiratory epithelial cells, it binds to ACE2 receptor via the RBD in S1. Already cleaved at the  
154 S1/S2 site, the Delta virion facilitates cleavage at S2' by the cell surface protease TMPRSS2,  
155 leading to an activation of the S2 fusion peptide (FP) for viral and plasma membrane fusion.<sup>23</sup>

156 Thus, the improved spike cleavage enhances viral replication when the Delta variant infects  
157 respiratory epithelial cells.

158 One major concern with the emergence of Delta variant is its association with increased  
159 breakthrough infections in vaccinated people.<sup>5,9</sup> As a critical target for host immunity, changes in  
160 the spike protein of SARS-CoV-2 variants have been implicated in reducing antibody  
161 neutralization.<sup>29</sup> Among all tested variants (including Delta), the Beta and Kappa variants have  
162 been shown to reduce the BNT162b2 vaccine-elicited neutralizing titers the most;<sup>2,30-32</sup> yet,  
163 BNT162b2 showed 100% vaccine efficacy against Beta variant-associated severe, critical or  
164 fatal disease in Qatar and 100% real-world effectiveness against Beta variant-associated  
165 COVID-19 in South Africa.<sup>33,34</sup> These real-world vaccine efficacy/effectiveness and *in vitro*  
166 neutralization results argue that breakthrough infections by the Delta variant in vaccinated  
167 individuals do not reflect immune escape. Instead, the increased breakthrough infection is likely  
168 due to enhanced viral replication fitness of the Delta variant through augmented spike  
169 processing. Consistent with this hypothesis, the viral RNA loads in the oropharynx from Delta  
170 variant-infected patients were >1,200-fold higher than those from the original Wuhan virus-  
171 infected patients.<sup>9</sup> Together, the results indicate changes in viral processing and infection  
172 efficiency, rather than evasion of antibodies, drive breakthrough infections of Delta variant in  
173 vaccinated individuals.

174 In summary, using a reverse genetic system and primary human airway cultures, we  
175 have identified spike mutation P681R as a significant determinant for enhanced viral replication  
176 fitness of the Delta compared to the Alpha variant. The P681R mutation enhances spike protein  
177 processing through the improved furin cleavage site. As new variants continue to emerge, spike  
178 mutations that affect furin cleavage efficiency, as well as other mutations that may increase viral  
179 replication, pathogenesis, and/or immune escape, must be closely monitored.

180

## 181 **Methods**

182 **Cells.** African green monkey kidney epithelial Vero E6 cells (ATCC, Manassas, VA,  
183 USA) were grown in Dulbecco's modified Eagle's medium (DMEM; Gibco/Thermo Fisher,  
184 Waltham, MA, USA) with 10% fetal bovine serum (FBS; HyClone Laboratories, South Logan,  
185 UT) and 1% penicillin/streptomycin (Gibco). Human lung adenocarcinoma epithelial Calu-3 cells  
186 (ATCC) were maintained in a high-glucose DMEM containing sodium pyruvate and GlutaMAX  
187 (Gibco) with 10% FBS and 1% penicillin/streptomycin at 37°C with 5% CO<sub>2</sub>. The EpiAirway  
188 system is a primary human airway 3D tissue model purchased from MatTek Life Science  
189 (Ashland, MA, USA). This EpiAirway system was maintained with the provided culture medium  
190 at 37°C with 5% CO<sub>2</sub> following manufacturer's instruction. All other culture medium and  
191 supplements were purchased from Thermo Fisher Scientific (Waltham, MA, USA). All cell lines  
192 were verified and tested negative for mycoplasma.

193 **Construction of infectious cDNA clones and SARS-CoV-2 mutant viruses.** The full-  
194 length (FL) cDNA clones of Alpha and Delta variants were constructed through mutagenesis of  
195 a previously established cDNA clone of USA/WA1-2020 SARS-CoV-2.<sup>12,13</sup> The previous seven-  
196 fragment *in vitro* ligation method was improved to a three-fragment ligation approach (**Extended**  
197 **data Fig. 1a**) to construct the full-length cDNA clones of Alpha and Delta SARS-CoV-2,  
198 resulting in Alpha-FL and Delta-FL, respectively. Prior to the three-fragment ligation, mutations  
199 from Alpha or Delta variants were engineered into individual fragments of USA/WA1-2020 using  
200 a standard mutagenesis method. The sequences for constructing Alpha, Delta and Alpha-  
201 spike/Delta-backbone were downloaded from GISAID database, the accession ID for Alpha is  
202 EPI\_ISL\_999340, accession ID for Delta is EPI\_ISL\_2100646. Individual point mutations for  
203 Alpha (NSP3: P153L, T183I, A890D, I1412T; NSP6: SGF106-108del; NSP12: P323L; Spike:  
204 HV69-70del, Y145del, N501Y, A570D, D614G, P681H, T716I, S982A, D1118H; ORF8:  
205 Q27stop, R52I, Y73C, S84L; N: D3L, R203K, G204R, S235F) and individual point mutations for



206 Delta (NSP2: P129L; NSP3: P822L; H1274Y; NSP4: A446V; NSP6: V149A; NSP12: P323L;  
207 V355A; G671S; NSP13: P77L; NSP15: H234Y; Spike: T19R, G142D, E156G, FR157-158del,  
208 L452R, T478K, D614G, P681R, D950N; ORF3a: S26L; M: I82T; ORF7a: V82A; L116F; T120I;  
209 ORF8: S84L; DF119-120del; N: D63G; R203M; D377Y; R385K) were introduced into subclones  
210 of individual fragments by overlapping fusion PCR. For preparing Alpha-spike/Delta-backbone  
211 virus, the spike gene of Delta was replaced with the spike gene of the Alpha. For preparing  
212 Delta-P681 virus, the P681 reversion was introduced into a subclone containing Delta spike  
213 gene by overlapping fusion PCR. All primers used for the construction were listed in **Extended**  
214 **Data Table 1**. The full-length infectious clones of SARS-CoV-2 variants were assembled by *in*  
215 *vitro* ligation of contiguous DNA fragments. *In vitro* transcription was then performed to  
216 synthesize full-length genomic RNA. For recovering recombinant viruses, the RNA transcripts  
217 were electroporated into Vero E6 cells. The viruses from electroporated cells were harvested at  
218 40 h post electroporation and served as P0 stocks. All viruses were passaged once on Vero E6  
219 cells to produce P1 stocks for subsequent experiments. All P1 viruses were subjected to next  
220 generation sequencing to confirm the introduced mutations without undesired changes. Viral  
221 titers were determined by plaque assay on Vero E6 cells. All virus preparation and experiments  
222 were performed in a biosafety level 3 (BSL-3) facility. Viruses and plasmids are available from  
223 the World Reference Center for Emerging Viruses and Arboviruses (WRCEVA) at the University  
224 of Texas Medical Branch.

225 **RNA extraction, RT-PCR, and Sanger sequencing.** Cell culture supernatants were  
226 mixed with a five-fold excess of TRIzol™ LS Reagent (Thermo Fisher Scientific, Waltham, MA,  
227 USA). Viral RNAs were extracted according to the manufacturer's instructions. The RNAs were  
228 amplified using a SuperScript™ III One-Step RT-PCR kit (Invitrogen, Carlsbad, CA, USA)  
229 following the manufacturer's protocol. The size of desired amplicon was verified with 2 µl of  
230 PCR product on an agarose gel. The remaining 18 µl of RT-PCR DNA was purified by a

231 QIAquick PCR Purification kit (Qiagen, Germantown, MD, USA). Sequences of the purified RT-  
232 PCR products were generated using a BigDye Terminator v3.1 cycle sequencing kit (Applied  
233 Biosystems, Austin, TX, USA). The sequencing reactions were purified using a 96-well plate  
234 format (EdgeBio, San Jose, CA, USA) and analyzed on a 3500 Genetic Analyzer (Applied  
235 Biosystems, Foster City, CA). The peak electropherogram height representing each mutation  
236 site and the proportion of each competitor was analyzed using the QSVanalyser program. For  
237 the competition assay, R software is used for the figure generation and statistical analysis. The  
238 presented viral RNA ratios in the figures were normalized by the input viral RNA ratios  
239 **(Extended Data Table 2)**.

240 **Plaque assay.** Approximately  $1.2 \times 10^6$  Vero E6 cells were seeded to each well of 6-well  
241 plates and cultured at 37°C, 5% CO<sub>2</sub> for 16 h. Virus was serially diluted in DMEM with 2% FBS  
242 and 200 µl diluted viruses were transferred onto the cell monolayers. The viruses were  
243 incubated with the cells at 37°C with 5% CO<sub>2</sub> for 1 h. After the incubation, overlay medium was  
244 added to the infected cells per well. The overlay medium contained DMEM with 2% FBS, 1%  
245 penicillin/streptomycin, and 1% sea-plaque agarose (Lonza, Walkersville, MD). After 2.5-day  
246 incubation, plates were stained with neutral red (Sigma-Aldrich, St. Louis, MO, USA) and  
247 plaques were counted on a light box.

248 **Next generation sequencing (NGS).** The competition results generated by Sanger  
249 sequencing were confirmed using NGS methods. Briefly, viral RNA samples from competition  
250 groups of (i) Delta versus Alpha and (ii) Delta versus Alpha-spike/Delta-backbone were used for  
251 a specific one-step RT-PCR that containing the A23063T mutation site. Viral RNA samples from  
252 competition group of Alpha versus Alpha-spike/Delta-backbone were quantified by the T14444C  
253 mutation. The RT-PCR primers were listed in **Extended Data Table 1**. The PCR products were  
254 purified by a QIAquick PCR Purification kit (Qiagen, Germantown, MD) according to the  
255 manufacturer's protocol. Dual-indexed adapter sequences (New England BioLabs, Ipswich, MA)

256 were added with 5 cycles of PCR. Samples were pooled and sequenced on an Illumina MiniSeq  
257 Mid-Output flow cell with the paired-end 150 base protocol. The reads were filtered for Q-scores  
258 of 37 at the A23063T and T14444C mutation sites and adjacent bases and counted. For the  
259 competition assay, R software is used for the figure generation and statistical analysis.

260 **Viral infection of cell lines.** Approximately  $3 \times 10^5$  Calu-3 cells were seeded onto each  
261 well of 12-well plates and cultured at 37°C, 5% CO<sub>2</sub> for 16 h. Equal PFUs of two viruses were  
262 inoculated onto Calu-3 cells at a final MOI of 0.1. The mixed viruses were incubated with the  
263 cells at 37°C for 2 h. After infection, the cells were washed thrice with DPBS to remove residual  
264 viruses. One milliliter of culture medium was added into each well. At each time point, 100 µl of  
265 culture supernatants were lysed in TRIzol LS reagent for the detection of competition assay,  
266 and 100 µl of fresh medium was added into each well to replenish the culture volume. The cells  
267 were infected in triplicate for each group of viruses. All samples were stored at -80°C until  
268 analysis.

269 **Primary human airway cultures.** The EpiAirway system is a primary human airway 3D  
270 mucociliary tissue model consisting of normal, human-derived tracheal/bronchial epithelial cells.  
271 Different combinations of mixed viruses for competition assays were inoculated onto the culture  
272 at a total MOI of 5. After 2 h infection at 37 °C with 5% CO<sub>2</sub>, the inoculum was removed, and the  
273 culture was washed three times with DPBS. The infected epithelial cells were maintained  
274 without any medium in the apical well, and medium was provided to the culture through the  
275 basal well. The infected cells were incubated at 37 °C, 5% CO<sub>2</sub>. From day 1 to day 5 post  
276 infection, 300 µl of DPBS were added onto the apical side of the airway culture and incubated at  
277 37°C for 30 min to elute progeny viruses. All virus samples in DPBS were stored at -80°C and  
278 quantified by plaque assays on Vero E6 cells.

279 **Virion purification and Western blotting.** Vero E6 expressing TMPRSS2 were  
280 infected with different SARS-CoV-2 at an MOI of 0.01. At 24 h post infection, the culture

281 medium was collected, purified through a 20% sucrose cushion, and analyzed by Western blot  
282 as previously described.<sup>21</sup> Densitometry was performed to quantify the cleavage efficiency of  
283 full-length spike to S1/S2 subunits using ImageLab 6.0.1 (Bio-Rad #12012931). The average  
284 results of two experiments were presented.

285 **Spike RBD and ACE2 binding.** The human ACE2 protein was purchased from Sino  
286 Biological (Beijing, China; Cat# 10108-H08H) and the human IgG1 Fc-tagged RBD proteins  
287 were made in-house using a method as previously described<sup>35</sup>. The affinity measurement was  
288 performed on the ForteBio Octet RED 96 system (Sartorius, Goettingen, Germany). Briefly, the  
289 RBD proteins (20 µg/ml) of Alpha or Delta RBDs were captured onto protein A biosensors for  
290 300s. The loaded biosensors were then dipped into the kinetics buffer for 10 s for adjustment of  
291 baselines. Subsequently, the biosensors were dipped into serially diluted (from 1.23 to 300 nM)  
292 human ACE2 protein for 200 s to record association kinetics and then dipped into kinetics buffer  
293 for 400 s to record dissociation kinetics. Kinetic buffer without ACE2 was used to correct the  
294 background. The Octet Data Acquisition 9.0 software was used to collect affinity data. For fitting  
295 of  $K_D$  values, Octet Data Analysis software V11.1 was used to fit the curve by a 1:1 binding  
296 model using the global fitting method.

297 **Statistics.** For virus competition experiments, relative replicative fitness values for  
298 different variants were analyzed according to  $w=(f_0/i_0)$ , where  $i_0$  is the initial two-virus ratio and  
299  $f_0$  is the final two-virus ratio after competition. Sanger sequencing (initial timepoint T0) counts  
300 for each virus being compared were based upon average counts over three replicate samples of  
301 inocula per experiment, and post-infection (timepoint T1) counts were taken from samples of  
302 individual subjects. Multiple experiments were performed, so that  $f_0/i_0$  was clustered by  
303 experiment. To model  $f_0/i_0$ , the ratio T0/T1 was found separately for each subject in each virus  
304 group, log (base-10) transformed to an improved approximation of normality and modeled by  
305 analysis of variance with relation to group, adjusting by experiment when appropriate to control

306 for clustering within experiment. Specifically, the model was of the form  
307  $\text{Log}_{10}(\text{Count}_{T1}/\text{Count}_{T0}) \sim \text{Experiment} + \text{Group}$ . Fitness ratios between the two groups [the  
308 model's estimate of  $w=(f_0/i_0)$ ] were assessed per the coefficient of the model's Group term,  
309 which was transformed to the original scale as  $10^{\text{coefficient}}$ . This modeling approach  
310 compensates for any correlation due to clustering within experiment similarly to that of  
311 corresponding mixed effect models and is effective since the number of experiments was small.  
312 Statistical analyses were performed using R statistical software (R Core Team, 2019, version  
313 3.6.1). In all statistical tests, two-sided  $\alpha=.05$ . Catseye plots<sup>36</sup>, which illustrate the normal  
314 distribution of the model-adjusted means, were produced using the "catseyes" package<sup>37</sup>.

315

#### 316 **Data availability.**

317 Extended Data and source data for generating main figures are available in the online  
318 version of the paper. Any other information is available upon request.

319

#### 320 **Acknowledgments**

321 P.-Y.S. was supported by National Institutes of Health (NIH) grants AI134907 and  
322 UL1TR001439, and awards from the Sealy and Smith Foundation, the Kleberg Foundation, the  
323 John S. Dunn Foundation, the Amon G. Carter Foundation, the Gillson Longenbaugh  
324 Foundation, and the Summerfield Robert Foundation. Z.A. was supported in by a Welch  
325 Foundation grant AU-0042-20030616 and Cancer Prevention and Research Institute of Texas  
326 (CPRIT) Grants RP150551 and RP190561. S.C.W. was supported by NIH grant R24 AI120942.  
327 V.D.M. was supported by NIH grants AI153602 and 1R21AI145400. J.L. and B.A.J. were  
328 supported by James W. McLaughlin Fellowship Fund.

329

### 330 **Author contributions**

331           Conceptualization, Y.L., J.L., S.C.W., V.D.M., X.X., P.-Y.S.; Methodology, Y.L., J.L.,  
332 B.A.J., H.X., Z.K., C.S., S.G.W., Z.A., X.X.; Investigation, Y.L., J.L., B.A.J., H.X., Z.A., S.C.W.,  
333 V.D.M., X.X., P.-Y.S.; Resources, H.X., B.A.J., Z.K., Z.A. X.X.; Data Curation, Y.L., J.L., B.A.J.,  
334 H.X., Z.K., C.S., S.C.W., V.D.M., X.X., P.-Y.S.; Writing-Original Draft, Y.L., J.L., X.X., P.-Y.S;  
335 Writing-Review & Editing, Y.L., J.L., B.A.J., H.X., Z.K., C.S., S.G.W., Z.A., S.C.W., V.D.M., X.X.,  
336 P.-Y.S.; Supervision, X.X., S.C.W., V.D.M., P.-Y.S.; Funding Acquisition, Z.A., S.C.W., V.D.M.,  
337 P.-Y.S.

338

### 339 **Competing financial interests**

340           X.X., V.D.M., and P.-Y.S. have filed a patent on the reverse genetic system and reporter  
341 SARS-CoV-2. Other authors declare no competing interests.

342

### 343 **References**

- 344 1       Plante, J. A. *et al.* Spike mutation D614G alters SARS-CoV-2 fitness. *Nature* **592**, 116-121,  
345 doi:10.1038/s41586-020-2895-3 (2021).
- 346 2       Chen, R. E. *et al.* Resistance of SARS-CoV-2 variants to neutralization by monoclonal and serum-  
347 derived polyclonal antibodies. *Nat Med* **27**, 717-726, doi:10.1038/s41591-021-01294-w (2021).
- 348 3       Hou, Y. J. *et al.* SARS-CoV-2 D614G variant exhibits efficient replication ex vivo and transmission  
349 in vivo. *Science* **370**, 1464-1468, doi:10.1126/science.abe8499 (2020).
- 350 4       Liu, Y. *et al.* The N501Y spike substitution enhances SARS-CoV-2 transmission. *bioRxiv*,  
351 doi:10.1101/2021.03.08.434499 (2021).
- 352 5       Brown, C. M. *et al.* Outbreak of SARS-CoV-2 Infections, Including COVID-19 Vaccine  
353 Breakthrough Infections, Associated with Large Public Gatherings — Barnstable County,  
354 Massachusetts, July 2021. *Morbidity and Mortality Weekly Report (MMWR)*,  
355 [https://www.cdc.gov/mmwr/volumes/70/wr/mm7031e7032.htm?s\\_cid=mm7031e7032\\_w&fbclid=IwAR7032WV7036ul\\_A-l\\_VN\\_7015KX7034bedb7038CeLJKRwiDWZ-blUuWmZMKbs7094xdhTiPLs](https://www.cdc.gov/mmwr/volumes/70/wr/mm7031e7032.htm?s_cid=mm7031e7032_w&fbclid=IwAR7032WV7036ul_A-l_VN_7015KX7034bedb7038CeLJKRwiDWZ-blUuWmZMKbs7094xdhTiPLs)  
356 [https://www.cdc.gov/mmwr/volumes/70/wr/mm7031e7032.htm?s\\_cid=mm7031e7032\\_w&fbclid=IwAR7032WV7036ul\\_A-l\\_VN\\_7015KX7034bedb7038CeLJKRwiDWZ-blUuWmZMKbs7094xdhTiPLs](https://www.cdc.gov/mmwr/volumes/70/wr/mm7031e7032.htm?s_cid=mm7031e7032_w&fbclid=IwAR7032WV7036ul_A-l_VN_7015KX7034bedb7038CeLJKRwiDWZ-blUuWmZMKbs7094xdhTiPLs)  
357 [https://www.cdc.gov/mmwr/volumes/70/wr/mm7031e7032.htm?s\\_cid=mm7031e7032\\_w&fbclid=IwAR7032WV7036ul\\_A-l\\_VN\\_7015KX7034bedb7038CeLJKRwiDWZ-blUuWmZMKbs7094xdhTiPLs](https://www.cdc.gov/mmwr/volumes/70/wr/mm7031e7032.htm?s_cid=mm7031e7032_w&fbclid=IwAR7032WV7036ul_A-l_VN_7015KX7034bedb7038CeLJKRwiDWZ-blUuWmZMKbs7094xdhTiPLs) (2021).

- 358 6 Zhou, B. *et al.* SARS-CoV-2 spike D614G change enhances replication and transmission. *Nature*  
359 **592**, 122-127, doi:10.1038/s41586-021-03361-1 (2021).
- 360 7 WHO. Track SARS-CoV-2 variants. [https://www.who.int/en/activities/tracking-SARS-CoV-2-](https://www.who.int/en/activities/tracking-SARS-CoV-2-variants/)  
361 [variants/](https://www.who.int/en/activities/tracking-SARS-CoV-2-variants/) (2021).
- 362 8 CDC. COVID data tracker. <https://covid.cdc.gov/covid-data-tracker/#variant-proportions> (2021).
- 363 9 Li, B. *et al.* Viral infection and transmission in a large, well-traced outbreak caused by the SARS-  
364 CoV-2 Delta variant. *medRxiv*,  
365 <https://www.medrxiv.org/content/10.1101/2021.1107.1107.21260122v21260122> (2021).
- 366 10 Mlcochova, P. *et al.* SARS-CoV-2 B.1.617.2 Delta variant emergence, replication and sensitivity to  
367 neutralising antibodies. *BioRxiv* (2021).
- 368 11 Chia, P. Y. *et al.* Virological and serological kinetics of SARS-CoV-2 Delta variant vaccine2  
369 breakthrough infections: a multi-center cohort study. *medRxiv*,  
370 <https://www.medrxiv.org/content/10.1101/2021.1107.1128.21261295v21261291> (2021).
- 371 12 Xie, X. *et al.* An Infectious cDNA Clone of SARS-CoV-2. *Cell Host Microbe* **27**, 841-848 e843,  
372 doi:10.1016/j.chom.2020.04.004 (2020).
- 373 13 Xie, X. *et al.* Engineering SARS-CoV-2 using a reverse genetic system. *Nature Protocols* **16**, 1761-  
374 1784, doi:10.1038/s41596-021-00491-8 (2021).
- 375 14 Liu, J. *et al.* Role of mutational reversions and fitness restoration in Zika virus spread to the  
376 Americas. *Nat Commun* **12**, 595, doi:10.1038/s41467-020-20747-3 (2021).
- 377 15 Wisner, M. J. & Lenski, R. E. A Comparison of Methods to Measure Fitness in *Escherichia coli*. *PLoS*  
378 *One* **10**, e0126210, doi:10.1371/journal.pone.0126210 (2015).
- 379 16 Grubaugh, N. D. *et al.* Genetic Drift during Systemic Arbovirus Infection of Mosquito Vectors  
380 Leads to Decreased Relative Fitness during Host Switching. *Cell Host Microbe* **19**, 481-492,  
381 doi:10.1016/j.chom.2016.03.002 (2016).
- 382 17 Bergren, N. A. *et al.* "Submergence" of Western equine encephalitis virus: Evidence of positive  
383 selection argues against genetic drift and fitness reductions. *PLoS Pathog* **16**, e1008102,  
384 doi:10.1371/journal.ppat.1008102 (2020).
- 385 18 Touret, F. *et al.* Replicative Fitness of a SARS-CoV-2 20I/501Y.V1 Variant from Lineage B.1.1.7 in  
386 Human Reconstituted Bronchial Epithelium. *mBio*, e0085021, doi:10.1128/mBio.00850-21  
387 (2021).
- 388 19 Organization, W. H. Coronavirus Disease (COVID-19): Weekly Epidemiological Update.  
389 [https://reliefweb.int/report/world/coronavirus-disease-covid-19-weekly-epidemiological-](https://reliefweb.int/report/world/coronavirus-disease-covid-19-weekly-epidemiological-update-11-may-2021)  
390 [update-11-may-2021](https://reliefweb.int/report/world/coronavirus-disease-covid-19-weekly-epidemiological-update-11-may-2021) (2021).
- 391 20 Coutard, B. *et al.* The spike glycoprotein of the new coronavirus 2019-nCoV contains a furin-like  
392 cleavage site absent in CoV of the same clade. *Antiviral Res* **176**, 104742,  
393 doi:10.1016/j.antiviral.2020.104742 (2020).
- 394 21 Johnson, B. A. *et al.* Loss of furin cleavage site attenuates SARS-CoV-2 pathogenesis. *Nature* **591**,  
395 293-299, doi:10.1038/s41586-021-03237-4 (2021).
- 396 22 Peacock, T. P. *et al.* The furin cleavage site in the SARS-CoV-2 spike protein is required for  
397 transmission in ferrets. *Nat Microbiol* **6**, 899-909, doi:10.1038/s41564-021-00908-w (2021).
- 398 23 Murgolo, N. *et al.* SARS-CoV-2 tropism, entry, replication, and propagation: Considerations for  
399 drug discovery and development. *PLoS Pathog* **17**, e1009225, doi:10.1371/journal.ppat.1009225  
400 (2021).
- 401 24 Korber, B. *et al.* Tracking Changes in SARS-CoV-2 Spike: Evidence that D614G Increases  
402 Infectivity of the COVID-19 Virus. *Cell* **182**, 812-827 e819, doi:10.1016/j.cell.2020.06.043 (2020).
- 403 25 Yurkovetskiy, L. *et al.* Structural and Functional Analysis of the D614G SARS-CoV-2 Spike Protein  
404 Variant. *Cell* **183**, 739-751, doi:10.1016/j.cell.2020.09.032 (2020).

- 405 26 Wan, Y., Shang, J., Graham, R., Baric, R. S. & Li, F. Receptor Recognition by the Novel Coronavirus  
406 from Wuhan: an Analysis Based on Decade-Long Structural Studies of SARS Coronavirus. *J Virol*  
407 **94**, doi:10.1128/JVI.00127-20 (2020).
- 408 27 Molloy, S. S., Bresnahan, P. A., Leppla, S. H., Klimpel, K. R. & Thomas, G. Human furin is a  
409 calcium-dependent serine endoprotease that recognizes the sequence Arg-X-X-Arg and  
410 efficiently cleaves anthrax toxin protective antigen. *Journal of Biological Chemistry* **267**, 16396-  
411 16402 (1992).
- 412 28 Krysan, D. J., Rockwell, N. C. & Fuller, R. S. Quantitative characterization of furin specificity.  
413 Energetics of substrate discrimination using an internally consistent set of hexapeptidyl  
414 methylcoumarinamides. *J Biol Chem* **274**, 23229-23234, doi:10.1074/jbc.274.33.23229 (1999).
- 415 29 Plante, J. A. *et al.* The variant gambit: COVID-19's next move. *Cell Host Microbe* **29**, 508-515,  
416 doi:10.1016/j.chom.2021.02.020 (2021).
- 417 30 Liu, Y. *et al.* Neutralizing Activity of BNT162b2-Elicited Serum. *N Engl J Med* **384**, 1466-1468,  
418 doi:10.1056/NEJMc2102017 (2021).
- 419 31 Liu, Y. *et al.* BNT162b2-Elicited Neutralization against New SARS-CoV-2 Spike Variants. *N Engl J*  
420 *Med*, doi:10.1056/NEJMc2106083 (2021).
- 421 32 Liu, J. *et al.* BNT162b2-elicited neutralization of B.1.617 and other SARS-CoV-2 variants. *Nature*,  
422 doi:10.1038/s41586-021-03693-y (2021).
- 423 33 Abu-Raddad, L. J., Chemaitelly, H., Butt, A. A. & National Study Group for, C.-V. Effectiveness of  
424 the BNT162b2 Covid-19 Vaccine against the B.1.1.7 and B.1.351 Variants. *N Engl J Med* **385**, 187-  
425 189, doi:10.1056/NEJMc2104974 (2021).
- 426 34 Thomas, S. J. *et al.* Six Month Safety and Efficacy of the BNT162b2 mRNA COVID-19 Vaccine. *N*  
427 *Engl J Med* In press (2021).
- 428 35 Ku, Z. *et al.* Molecular determinants and mechanism for antibody cocktail preventing SARS-CoV-  
429 2 escape. *Nat Commun* **12**, 469, doi:10.1038/s41467-020-20789-7 (2021).
- 430 36 Cumming, G. The New Statistics: Why and How. *Psychol. Sci.*, 7-29,  
431 doi:10.1177/0956797613504966 (2014).
- 432 37 Andersen, C. Catseyes: Create Catseye Plots Illustrating the Normal Distribution of the Means. R  
433 package version 0.2.3. (2019).
- 434



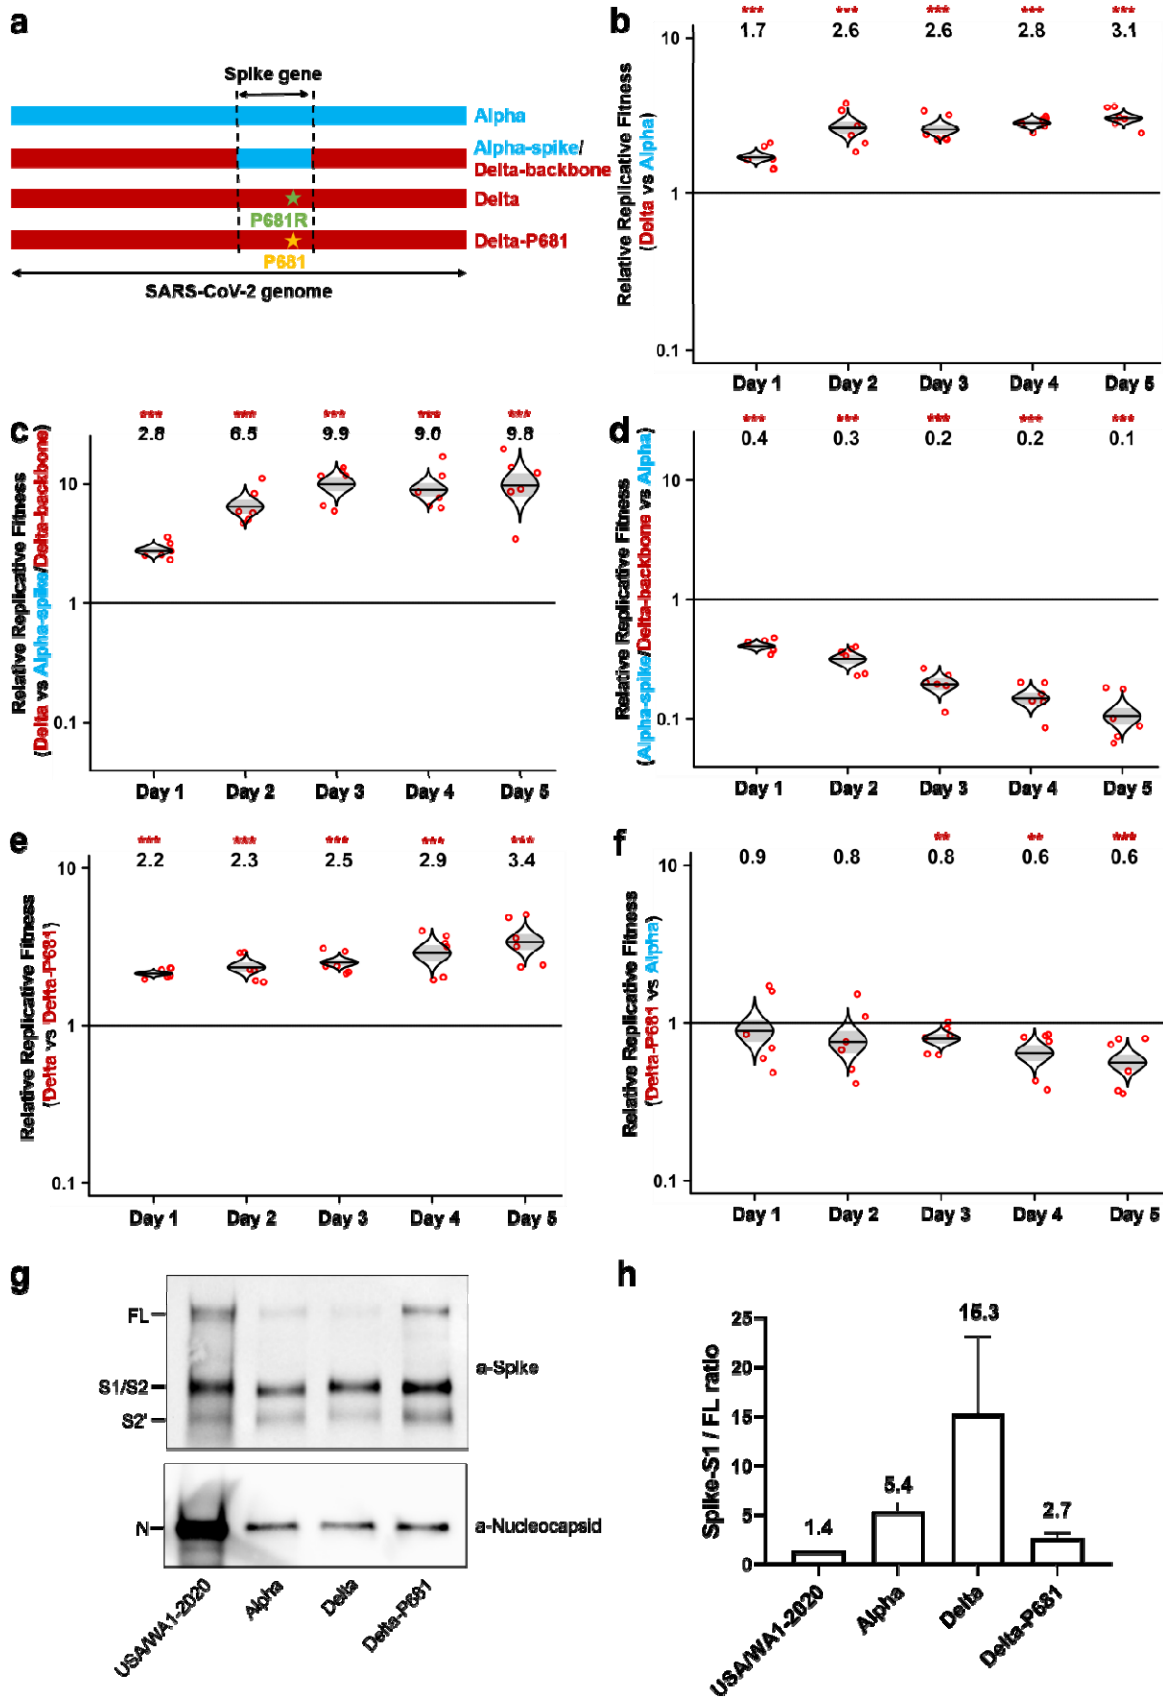

436 **Figure 1. Delta P681R mutation enhances SARS-CoV-2 fitness over Alpha variant through**  
437 **improving spike protein processing.**

438 **a**, Schemes of Alpha variant, Delta variant, Delta variant bearing Alpha-spike, and Delta variant  
439 with a P681R-to-P681 reversion. The spike gene of Delta variant was swapped with Alpha  
440 variant, resulting in chimeric SARS-CoV-2 “Alpha-spike/Delta-backbone.” The Delta P681R  
441 mutation was reverted wild-type P681, resulting in “Delta-P681” virus. Blue and red colors  
442 indicate Alpha and Delta variants, respectively. **b-f**, Viral replication competitions among Alpha,  
443 Delta, Alpha-spike/Delta-backbone, and Delta-P681 viruses on primary human airway epithelial  
444 (HAE) cells. Equal PFU of two viruses were mixed and inoculated onto HAE cells at an MOI of 5.  
445 Five pairs of viral competition are presented: Delta and Alpha (**b**), Delta and Alpha-spike/Delta-  
446 backbone (**c**), Alpha-spike/Delta-backbone and Alpha (**d**), Delta variant and Delta-P681 (**e**), and  
447 Delta-P681 and Alpha (**f**). After 2 h incubation, the cells were washed thrice with DPBS and  
448 maintained for 5 days. The secreted viruses were collected daily in DPBS after incubation at  
449 37°C for 30 min. Red dots represent individual cell cultures (n=6), the horizontal lines in each  
450 catseye represent the mean, shaded regions represent standard error of the mean; y-axes use  
451 a log<sub>10</sub> scale. Black numbers above each set of values (catseye) indicate the ratios of two viral  
452 RNA species. *P* values are calculated for group coefficient using linear regression model.  
453 \*\**p*<0.01, \*\*\**p*<0.001. **g**, Spike cleavages of purified virions. USA/WA1-2020, Alpha, Delta, and  
454 Delta-P681 viruses were purified and analyzed by Western blot using polyclonal antibodies  
455 against spike and anti-nucleocapsid antibodies. Full-length spike (FL), cleaved S1/S2, and S2'  
456 proteins were annotated. One representative image of two experiments is shown. **h**,  
457 Quantification of spike processing of different variants from **g**. Densitometry was performed to  
458 quantify the cleavage efficiency of FL spike to S1/S2 subunits using ImageLab 6.0.1. The ratios  
459 of S1/S2 over FL were calculated to indicate spike processing efficiencies. The average results  
460 of two experiments were presented as mean ± standard deviation.

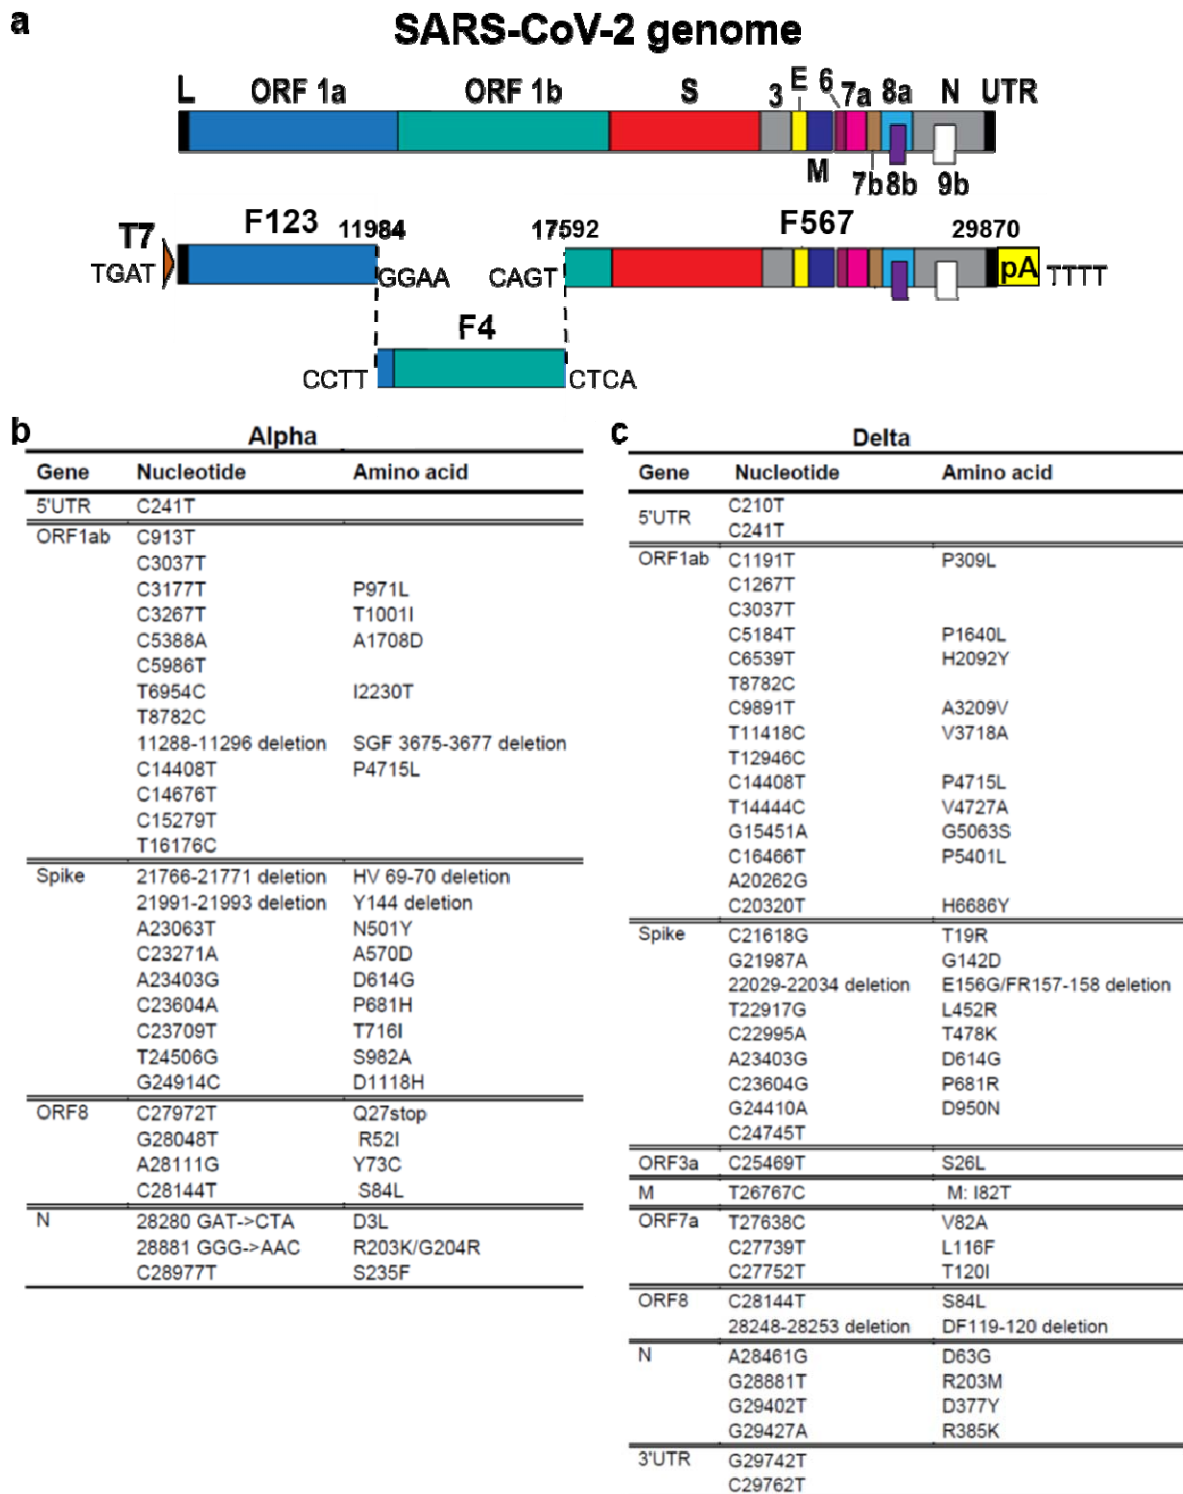

461

462 **Extended Data Figure 1. Construction of infectious cDNA clones for Alpha and Delta**  
 463 **variants.**

464 **a**, Construction of infectious cDNA clones for Alpha and Delta variants. A three-fragment *in vitro*  
 465 ligation was performed to construct the full-length cDNA clones of Alpha and Delta SARS-CoV-2.

466 The construction method was detailed previously.<sup>12,13</sup> ORFs, the Open reading frames; L, leader  
467 sequence; S, spike gene; E, envelope glycoprotein gene; M, membrane glycoprotein gene; N,  
468 nucleocapsid gene; UTR, untranslated region. **b,c**, Mutations from Alpha and Delta variants.  
469 The whole genome sequences of Alpha (EPI\_ISL\_999340) (**b**) and Delta (EPI\_ISL\_2100646) (**c**)  
470 were compared to USA/WA1-2020 strain. Nucleotide and amino acid mutations are presented.  
471

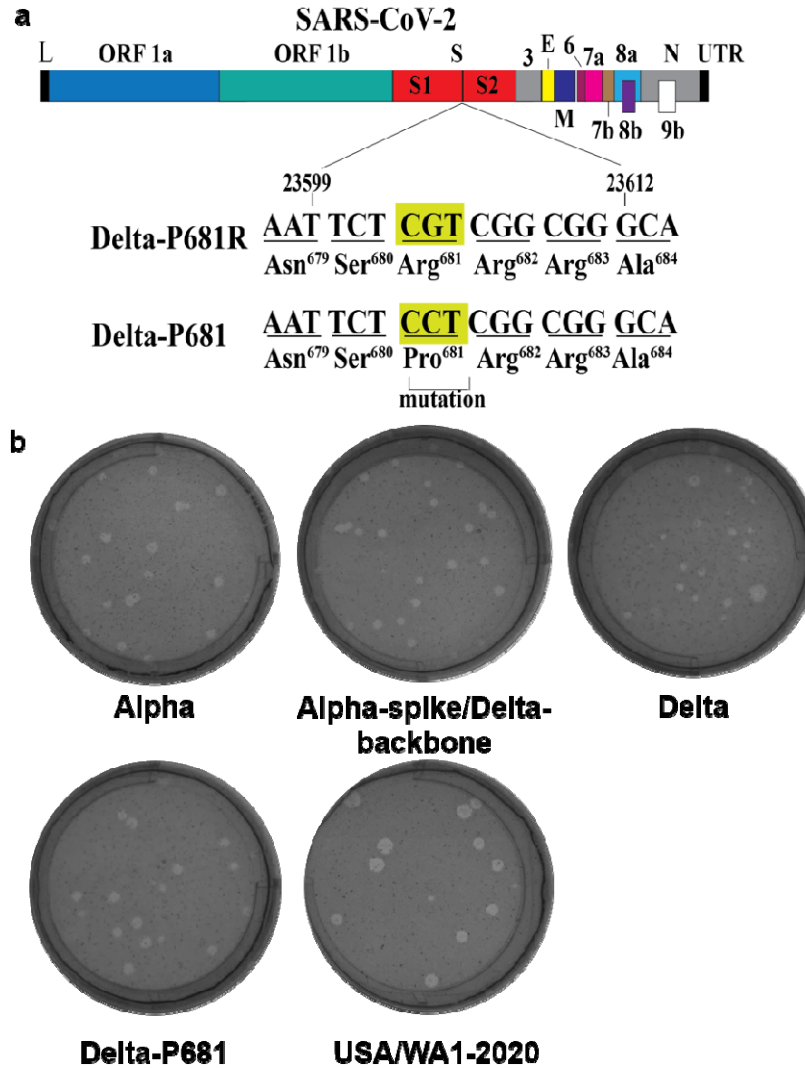

472

473 **Extended Data Figure 2. Construction of Delta-P681 SARS-CoV-2 and plaque**  
 474 **morphologies of different recombinant SARS-CoV-2s.**

475 **a**, Construction of revertant Delta-P681 SARS-CoV-2. Single nucleotide G-to-C substitution was  
 476 engineered into the Delta variant to construct Delta-P681 SARS-CoV-2. The nucleotide  
 477 positions of viral genome are annotated. **b**, Plaque morphologies of Alpha, Alpha-spike/Delta-  
 478 backbone, Delta, Delta-P681, and USA-WA1/2020 viruses. The plaque images were taken on  
 479 day 2.5 post infection of Vero E6 cells.

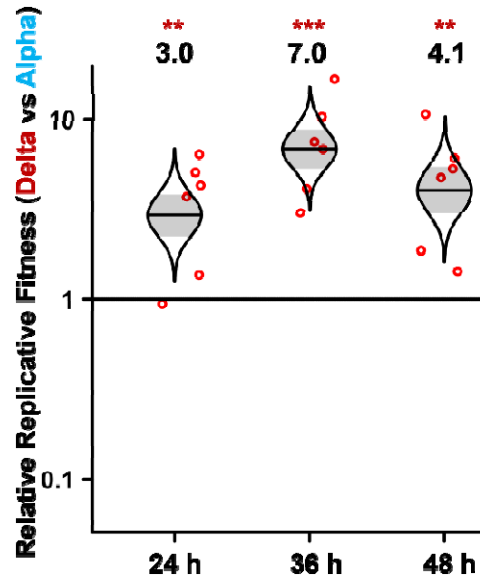

480

481 **Extended Data Figure 3. Viral replication competition between Delta and Alpha variants**  
482 **on Calu-3 cells.**

483 Recombinant Delta and Alpha SARS-CoV-2s were mixed in equal PFUs to infect Calu-3 cells at  
484 a total MOI of 0.1. At 2 h post infection, the cells were washed thrice with DPBS to remove free  
485 viruses. Culture medium were sampled for Sanger sequencing at 24 h, 36 h, and 48 h post  
486 infection. Red dots represent individual cell cultures (n=6); horizontal lines in each catseye  
487 represent the mean; shaded regions represent standard error of the mean; y-axes use a log<sub>10</sub>  
488 scale. Black numbers above each set of values (catseye) indicate the ratios of two viral RNA  
489 species. *P* values are calculated for group coefficient using linear regression model. \*\**p*<0.01,  
490 \*\*\**p*<0.001.

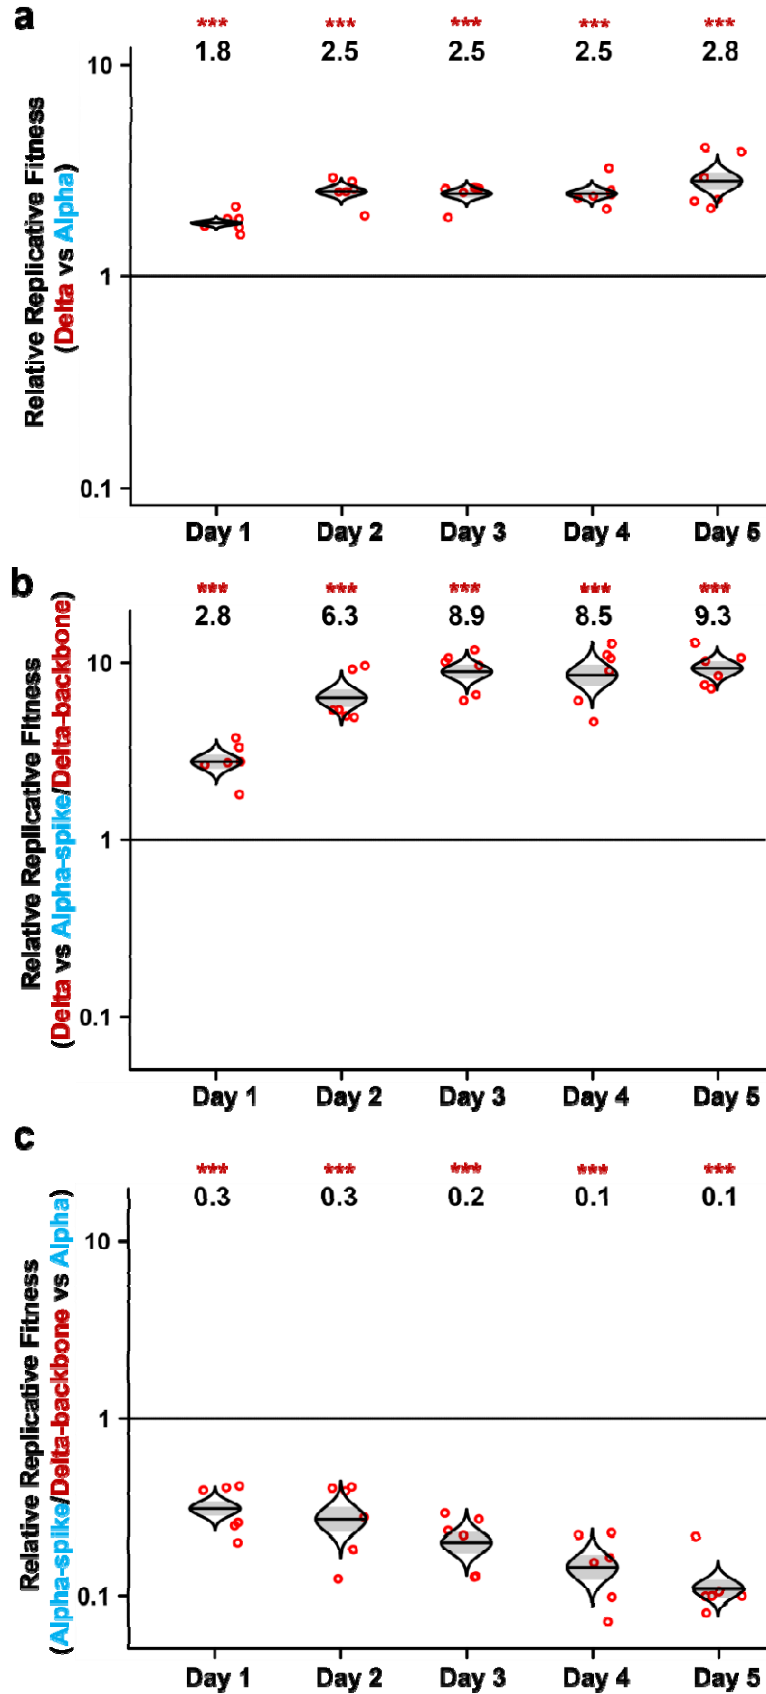

492 **Extended Data Figure 4. Validation of viral competition results by next generation**  
493 **sequencing.**

494 **a-c**, RNA samples from competition assays between Delta and Alpha (**a**), Delta and Alpha-  
495 spike/Delta-backbone (**b**), Alpha-spike/Delta-backbone and Alpha (**c**) were initially assessed  
496 using Sanger sequencing (**Fig. 1b-d**). The same RNA samples were retested here using next  
497 generation sequencing (NGS). Red dots represent individual cell cultures (n=6); the horizontal  
498 lines in each catseye represent the mean; shaded regions represent standard error of the mean;  
499 y-axes use a  $\log_{10}$  scale. Black numbers above each set of values (catseye) indicate the relative  
500 fitness estimates. *P* values are calculated for group coefficient using linear regression model.  
501 \*\*\* $p < 0.001$ .  
502



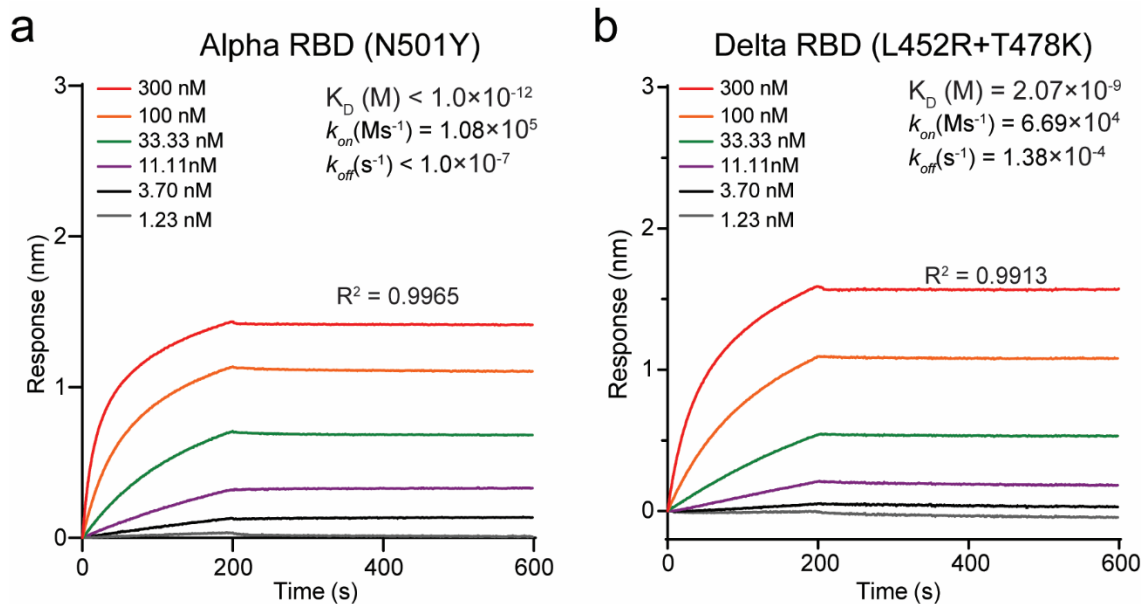

503

504 **Extended Data Figure 5. Binding affinities of Alpha and Delta RBDs to human ACE2**  
505 **receptor.**

506 **a-b**, Alpha RBD (**a**) and Delta RBD (**b**) proteins were captured onto protein A biosensors. The  
507 biosensors were then dipped into serially diluted human ACE2 protein and buffers to measure  
508 the association and dissociation kinetics. The binding affinity-related parameters, including  
509 association ( $K_{on}$ ), dissociation ( $K_{off}$ ), and affinity ( $K_D$ ) are shown. The affinity of ACE2 to Alpha  
510 RBD (N501Y) is below the detection limit and is presented as  $<1.0 \times 10^{-12}$ . The result for Alpha  
511 RBD and ACE2 binding was adopted from our previous study<sup>4</sup> for comparison.

512 **Extended Data Table 1. Primer list used for SARS-CoV-2 infectious clones construction,**  
 513 **RT-PCR and sequencing.**

| Construction of Alpha full length and Alpha-backbone infectious clone | Forward primer                                                 | Reverse primer                                                |
|-----------------------------------------------------------------------|----------------------------------------------------------------|---------------------------------------------------------------|
| C241T                                                                 | atctaggtttTgtccgggtgtgaccgaaag                                 | ctttcggtcacacccggacAaaacctagat                                |
| C913T                                                                 | tgactttgtcTgaacaactggactt                                      | aagtcctagttgtcAgacaaagtga                                     |
| C3037T                                                                | gtattgtctttTaccctccagatgagg                                    | cctcatctggagggaAaaagaacaatac                                  |
| C3177T                                                                | ctgctctcaacTtgaagaagagcaa                                      | ttgctctctcaAgtgaagagcag                                       |
| C3267T                                                                | cagacaactaTattcaacaattgtgagg                                   | cctcaacaattgttgaataAtagttgtctg                                |
| C5388A                                                                | ggctggggaagctgAtaacctttgtgc                                    | gcacaaaagttaTcagcttcaccagcc                                   |
| C5986T                                                                | attctattTcacagagcaaccaattg                                     | caattggtgctctgtAaaataagaat                                    |
| T6954C                                                                | gataaatattaCaatttggttttac                                      | gtaaaaaccaaatGtaatatttatc                                     |
| 11288-11296del                                                        | gatactagttgaagctaaaagactgtgt                                   | acacagctcttttagctcaaactagtatc                                 |
| C14408T                                                               | tacagtggtccacTtacaagtttggacc                                   | gggtccaaaactgtaAgtgggaactgtga                                 |
| C14676T                                                               | gtcaaaccTggtaatttaacaaag                                       | ctttgtaaaattaccAggtttgac                                      |
| C15279T                                                               | gaaaaccctcaTcttatgggtgggat                                     | atcccaaccataagAtgaggggtttc                                    |
| T16176C                                                               | ctaatgataacacCtcaaggtattggga                                   | tccaataacctgaGgtgttatcattag                                   |
| C27972T/G28048T                                                       | cttaacatcaaccatagttagttgatgaccgtgctctattc<br>acttcta           | ttatagctcctactctaataataccatttagaataagaagtgaata<br>ggaca       |
| A28111G/C28144T                                                       | cagtgcatcgataatcggttaattatacagtttctgtttaccctt<br>tac           | gtaaaaggtaaacaggaaactgtataattaccgatatcgat<br>gactg            |
| A28271del/28280-28282GAT-CTA                                          | caaaactaaatgtctctaaatggaccccaaaatcagcg                         | cgctgatttgggtccttagagacatttagttg                              |
| 28881-28883GGG-AAC                                                    | caactccaggcagcagtaaacgaactctcctgc                              | gcaggagaagttcgttactgctgcctggagttg                             |
| C28977T                                                               | tgagagcaaaatglttgtaaggccaaca                                   | tggtggcctttaccaaacattttgctctca                                |
| Alpha-F123-F1                                                         | cattatacgaagttatattcgatgctggccgctaatacgact<br>cactatagattaag   | gggcccgaacatgaagacagtg                                        |
| Alpha-F123-F2                                                         | acactgtctcatgttgcggcccaaatgttaacaaag                           | ctattacgttgtaacacatcatacaTgtAgatgaattac                       |
| Alpha-F123-F3                                                         | gtatgatgtgtacaacgtaataagagaacaagag                             | aggtcgactctagaggatccacATCGAtggtctcaaag<br>gcttcagtagtatcttagc |
| Alpha-F4                                                              | tgtagaaaaccagatatatt                                           | caaaactctacacgagcac                                           |
| Alpha-F567-F1                                                         | tatacgaagttatattcgatgctggccgctctcagagtgct<br>ttggttatgataataag | ctttgtgtataaaccacaatg                                         |
| Alpha-F567-F2                                                         | catttggtggttataacaacaaag                                       | caatcaagccagctataaaacc                                        |
| Alpha-F567-F3                                                         | ggtttatagctggcttgattg                                          | cgaggctcttagaagcctca                                          |
| Alpha-backbone-F567-F1                                                | tatacgaagttatattcgatgctggccgctctcagagtgct<br>ttggttatgataataag | ctttgtgtataaaccacaatg                                         |
| Alpha-backbone-F567-F2                                                | catttggtggttataacaacaaag                                       | caatcaagccagctataaaacc                                        |
| Alpha-backbone-F567-F3                                                | ggtttatagctggcttgattg                                          | cgaggctcttagaagcctca                                          |

| Construction of Delta full length and Delta-backbone infectious clone | Forward primer                           | Reverse primer                           |
|-----------------------------------------------------------------------|------------------------------------------|------------------------------------------|
| C210T                                                                 | GTTTCGTCGGTTTTGCAGCCGATCATC              | GATGATCGGCTGCAAACGGACGAAAC               |
| C241T                                                                 | ATCTAGGTTTTGTCCGGGTGTGACCGA<br>AAG       | CTTTCGGTCACACCCGGACAAAACCTAG<br>AT       |
| C1191T                                                                | CCAGTTGCGTCACTAAATGAATGCAAC<br>C         | GGTTGCATTCATTTAGTGACGCAACTGG             |
| C1267T                                                                | GGCAGACGGGTGATTTTTGTTAAAGCC              | GGCTTTAACAAAATCACCCGTCTGCC               |
| C3037T                                                                | GTATTGTTCTTTTTACCCTCCAGATGAG<br>G        | CCTCATCTGGAGGGTAAAAAGAACAATA<br>C        |
| C5184T                                                                | ACACAACCTGATCTTAGTTTTCTGGGTA<br>G        | CTACCCAGAAAATAAGATCAGTTGTGT              |
| C6539T                                                                | GAGGTTGGCTACACAGATCTAATGGC               | GCCATTAGATCTGTGTAGCCAACCTC               |
| T8782C                                                                | ACACATGGTTTAGCCAGCGTGGTGGTA<br>G         | CTACCACCACGCTGGCTAAACCATGTGT             |
| C9891T                                                                | GATACTTAGTCTTTATAATAAGTACAA<br>G         | CTTGACTTATTATAAAGAACTAAGTATC             |
| T11418C                                                               | CTTGACACTCGCTTATAAAGTTTATTAT<br>GG       | CCATAATAAACTTTATAAGCGAGTGTCAA<br>G       |
| T12946C                                                               | GGTCCTAAAGTGAAGTACTTATACTTTA<br>TT       | AATAAAGTATAAGTACTTCACTTTAGGAC<br>C       |
| C14408T                                                               | TACAGTGTCCCACTTACAAGTTTTGGA<br>CC        | GGTCCAAAACCTTGTAAGTGGGAACACTG<br>TA      |
| T14444C                                                               | GTGAGAAAAATATTTGCTGATGGTGT<br>CCA        | TGGAACACCATCAGCAAATATTTTTCTCA<br>C       |
| G15451A                                                               | GGTCATGTGTGGCAGTTCATATATGT<br>T          | AACATATAGTGAAGTCCACACATGACC              |
| C16466T                                                               | GTAATCACATAAACTACCCATTAGTTT<br>TCC       | GGAAAATAATGGGTAGTTTATGTGATTT<br>AC       |
| A20262G                                                               | GGAAATTGATTTCTTGAATTAGCTATG<br>G         | CCATAGCTAATTCCAAGAAATCAATTTCC            |
| C20320T                                                               | GCTATGCCTTCGAATATATCGTTTATGG             | CCATAAACGATATATTCGAAGGCATAGC             |
| C21618G                                                               | GTGTGTTAATCTTAGAACAGAACTC                | GAGTCTGGTTCTAAGATTAACACAC                |
| G21987A                                                               | GATCCATTTTTGGATGTTTATTACCAC              | GTGGTAATAAACATCCAAAATGGATC               |
| 22029-22034 deletion                                                  | GAAAGTGGAGTTTATTCTAGTGCGAAT<br>AATTGC    | ATAAACTCCACTTTCCATCCAACCTTTGT<br>TGTT    |
| T22917G                                                               | GGTGGTAATTATAATTACCGGTATAGAT<br>TGTTTAGG | CCTAAACAATCTATACCGGTAATTATAAT<br>TACCACC |
| C22995A                                                               | GGCCGGTAGCAAACCTTGTAATGGTG               | CACCATTACAAGGTTTGCTACCGGCC               |
| A23604G                                                               | GACTAATTCTCGTCGGCGGGCAGTA<br>GTGT        | AACTACGTGCCCGCCGACGAGAATTAG<br>TC        |
| G24410A                                                               | GGAAAACCTCAAATGTGGTCAACC                 | GGTTGACCACATTTTGAAGTTTCC                 |
| C24745T                                                               | CTCATGGTGTAGTTTTCTTGCATGTGA<br>C         | GTCACATGCAAGAAAACCTACACCATGAG            |
| C25469T                                                               | GATGCTACTCCTTTAGATTTTTGTTCCGCG           | CGCGAACAAAATCTAAAGGAGTAGCATC             |
| T26767C                                                               | CCGGTGAATTGCTACCGCAATGGCTT<br>G          | CAAGCCATTGCGGTAGCAATTCCACCGG             |
| T27638C                                                               | CGTGCCAGATCAGCTTCACTAAACTG<br>T          | ACAGTTTAGGTGAAGCTGATCTGGCAGC             |
| C27739T/C27752T                                                       | TCAAAGAAAAGATAGAATGATTGAACTT<br>TCA      | CATTCTATCTTTCTTTTGAATGTGAAGCA<br>AAGTG   |
| C28144T                                                               | TCGGTAATTATACAGTTTCTGTTTACC<br>TTTTAC    | GTAAGGTAACAGGAACTGTATAATT<br>ACCGA       |

|                                     |                                                             |                                                                |
|-------------------------------------|-------------------------------------------------------------|----------------------------------------------------------------|
| 28248-28253 deletion                | GACGTTTCGTGTTGTTTTAATCTAAACGA<br>ACAAACT                    | AGTTTGTTTCGTTTAGATTAACAACACG<br>AACGTC                         |
| 28271 deletion                      | GAACAACTAAATGTCTGATAATGGAC<br>CCC                           | GGGTCCATTATCAGACATTTAGTTTGT<br>C                               |
| A28461G                             | CATGGCAAGGAAGGCCTTAAATCCCT<br>C                             | GAGGGAATTTAAGGCCCTCCTTGCCATG                                   |
| G28881T                             | TCCAGGCAGCAGTATGGGAACCTTCTCC<br>TGC                         | GCAGGAGAAGTCCCATACTGCTGCCTG<br>GA                              |
| G29402T/G29427A                     | GCTTATGAACTCAAGCCTTACCGCAG<br>AACAGAAGAAAC                  | GTTTCTGCGGTAAAGCCTTGAGTTTCATAA<br>GCCTTCTTCTT                  |
| G29742T/C29762T                     | CACTCGGAGTACGATCGAGTGATAGT<br>GAACAAT                       | ACTATACACTCGATCGTACTCCGAGTGG<br>CCTCGG                         |
| Delta-F123-F1                       | cattatacgaagttatattcgatgcgccgctaatacgact<br>cactatagattaag  | gggccgacaacatgaagacagtg                                        |
| Delta-F123-F2                       | acactgtctcatgtgtcgcccaaatgttaacaaag                         | aggctgactctagaggatcccacATCGAtggtctcaaag<br>gcttcagtagtatcttagc |
| Delta-F4                            | cctcttaacacagcagccaaact                                     | caaaacactctacacgagcac                                          |
| Delta-F567                          | tatacgaagttatattcgatgcgccgctctcagagtgt<br>ttggttatgataataag | caaacatgagaattggtcgacggccc                                     |
| Delta-backbone-F567-F1              | tatacgaagttatattcgatgcgccgctctcagagtgt<br>ttggttatgataataag | ctttgtgtataaacccacaaatg                                        |
| Delta-backbone-F567-F2              | catttgggtttatacaacaaaag                                     | caatcaagccagctataaaacc                                         |
| Delta-backbone-F567-F3              | ggtttatagctggcttgattg                                       | cgaggctcttagaagcctca                                           |
| <b>RT-PCR for Sanger sequencing</b> | <b>Forward primer</b>                                       | <b>Reverse primer</b>                                          |
| Delta vs Delta-P681                 | tccactttaagtgttatggag                                       | gttaaagcacggttaattgtg                                          |
| Delta-P681 vs Alpha                 | tccactttaagtgttatggag                                       | gttaaagcacggttaattgtg                                          |
| Delta vs Alpha                      | tccactttaagtgttatggag                                       | gttaaagcacggttaattgtg                                          |
| Alpha-spike/Delta-backbone vs Alpha | tgtagaaaaccagatatatt                                        | tggaaaaccagctgattgtc                                           |
| Delta vs Alpha-spike/Delta-backbone | tccactttaagtgttatggag                                       | gttaaagcacggttaattgtg                                          |
| <b>RT-PCR for NGS</b>               | <b>Forward primer</b>                                       | <b>Reverse primer</b>                                          |
| Delta vs Alpha                      | ggttttaattgttacttctttaca                                    | aagaacacctgtgcctgtt                                            |
| Alpha-spike/Delta-backbone vs Alpha | acagtgtcccacctacaagt                                        | ccagaagcagcgtgcatagc                                           |
| Delta vs Alpha-spike/Delta-backbone | ggttttaattgttacttctttaca                                    | aagaacacctgtgcctgtt                                            |
| <b>Sanger sequencing</b>            | <b>Forward primer</b>                                       |                                                                |
| Delta vs Delta-P681                 | aggatgttaactgcacaga                                         |                                                                |
| Delta-P681 vs Alpha                 | aggatgttaactgcacaga                                         |                                                                |
| Delta vs Alpha                      | gattgctgattataattata                                        |                                                                |
| Alpha-spike/Delta-backbone vs Alpha | ggtgacactgacttaacaaagcc                                     |                                                                |
| Delta vs Alpha-spike/Delta-backbone | gattgctgattataattata                                        |                                                                |

514

515

516 **Extended Data Table 2. The input and output viral RNA ratios in competition assays**  
 517 **detected by sanger sequencing.**

| Groups                                     | HAE   |             |              | Calu-3 |             |              |
|--------------------------------------------|-------|-------------|--------------|--------|-------------|--------------|
|                                            | Days  | Input ratio | Output ratio | Hours  | Input ratio | Output ratio |
| <b>Delta vs Alpha</b>                      | Day 1 | 1.24        | 2.10         | 24h    | 1.53        | 4.56         |
|                                            | Day 2 | 1.24        | 3.24         | 36h    | 1.53        | 10.65        |
|                                            | Day 3 | 1.24        | 3.17         | 48h    | 1.53        | 6.21         |
|                                            | Day 4 | 1.24        | 3.51         |        |             |              |
|                                            | Day 5 | 1.24        | 3.78         |        |             |              |
| <b>Delta vs Alpha-spike/Delta-backbone</b> | Day 1 | 1.07        | 2.97         |        |             |              |
|                                            | Day 2 | 1.07        | 6.93         |        |             |              |
|                                            | Day 3 | 1.07        | 10.60        |        |             |              |
|                                            | Day 4 | 1.07        | 9.64         |        |             |              |
|                                            | Day 5 | 1.07        | 10.53        |        |             |              |
| <b>Alpha-spike/Delta-backbone vs Alpha</b> | Day 1 | 1.45        | 0.59         |        |             |              |
|                                            | Day 2 | 1.45        | 0.46         |        |             |              |
|                                            | Day 3 | 1.45        | 0.28         |        |             |              |
|                                            | Day 4 | 1.45        | 0.22         |        |             |              |
|                                            | Day 5 | 1.45        | 0.15         |        |             |              |
| <b>Delta vs Delta-P681</b>                 | Day 1 | 0.95        | 2.05         |        |             |              |
|                                            | Day 2 | 0.95        | 2.20         |        |             |              |
|                                            | Day 3 | 0.95        | 2.38         |        |             |              |
|                                            | Day 4 | 0.95        | 2.77         |        |             |              |
|                                            | Day 5 | 0.95        | 3.25         |        |             |              |
| <b>Delta-P681 vs Alpha</b>                 | Day 1 | 1.51        | 1.33         |        |             |              |
|                                            | Day 2 | 1.51        | 1.13         |        |             |              |
|                                            | Day 3 | 1.51        | 1.21         |        |             |              |
|                                            | Day 4 | 1.51        | 0.97         |        |             |              |
|                                            | Day 5 | 1.51        | 0.85         |        |             |              |

518
